# Supplementary material
Source: PubMed Central journal article supplement (PMC7448746)

**a**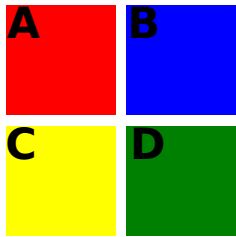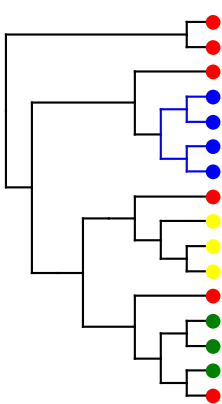**b**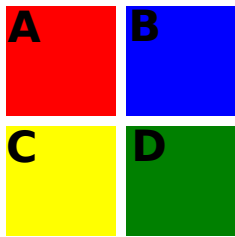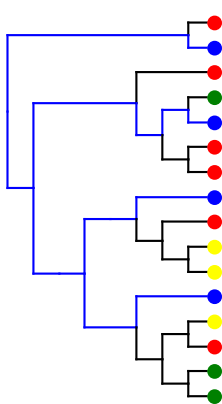

Supplement: mmc1.pdf [file mmc1.pdf]
