# Supplementary material
Source: PubMed Central journal article supplement (PMC7448746)

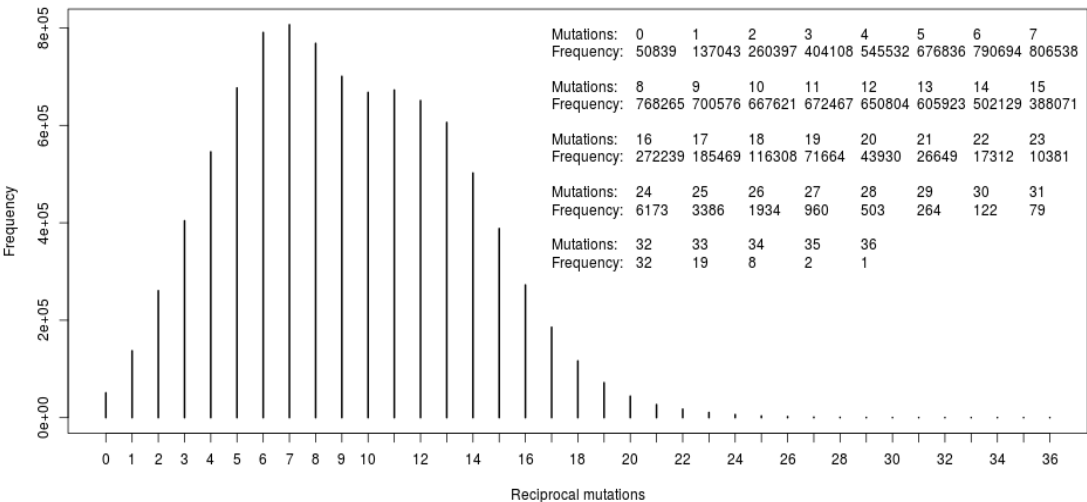

Supplement: mmc4.pdf [file mmc4.pdf]
